# Supplementary material
Source: PubMed Central journal article supplement (PMC2580699)
Supplement: supp_190_21_6948__2.pdf [file supp_190_21_6948__2.pdf]

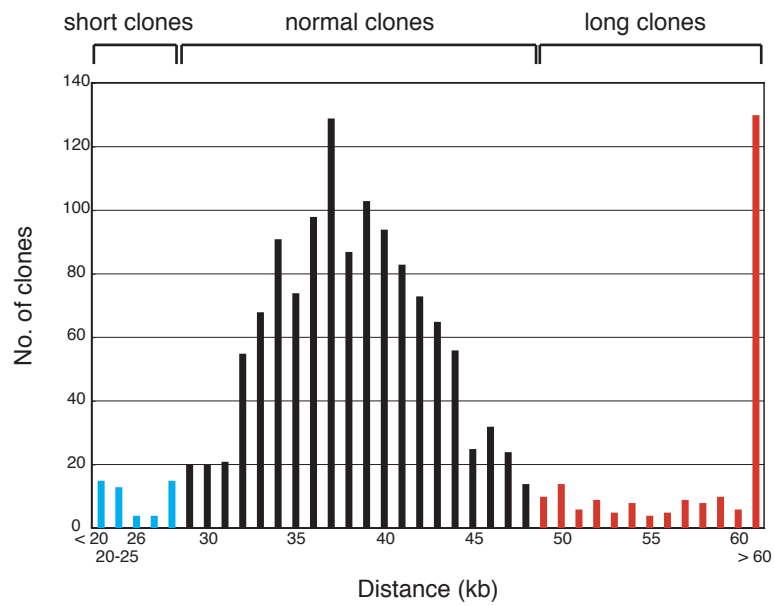

Figure S2. Distances between the forward and reverse end sequences of fosmid clones on the K-12 chromosome
