# Supplementary material
Source: PubMed Central journal article supplement (PMC2580699)

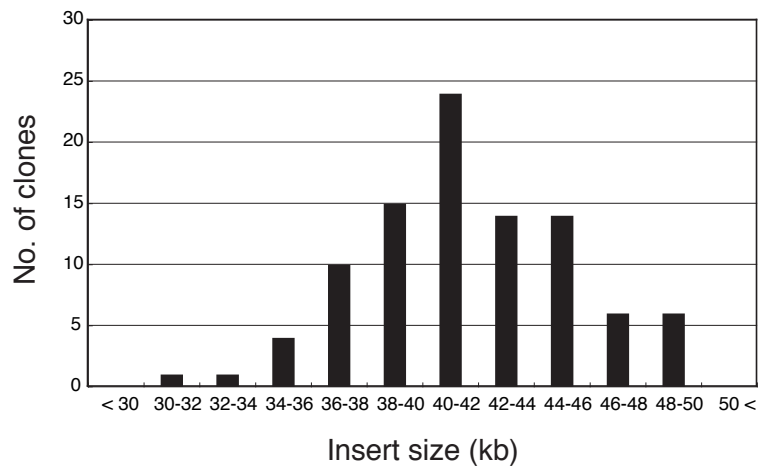

Figure S1. Insert sizes of randomly selected 95 fosmid clones

Supplement: supp_190_21_6948__1.pdf [file supp_190_21_6948__1.pdf]
